# Supplementary material for: Synthesis of Vertically Aligned Carbon Nanotubes on Silicalite‐1 Monolayer‐Supported Substrate
Source: Hindawi journal article supplement (doi:10.1155/2014/327398), 2014-01-01
Supplement: f1 [file 327398.f1.pdf]

## Supplementary Information

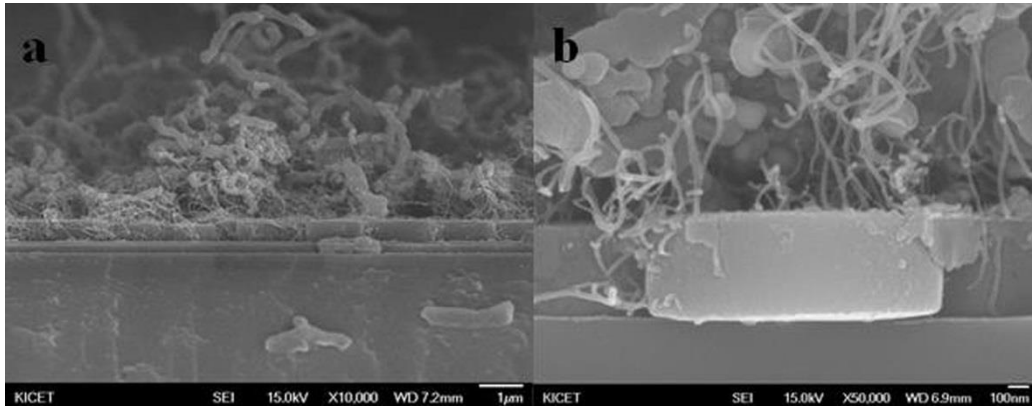

Fig. S1 SEM images of CNTs synthesized from radio-frequency sputtered  $\text{Fe}_2\text{O}_3$  film on the Z/Si: (a) view of large area, and (b) view of local area.

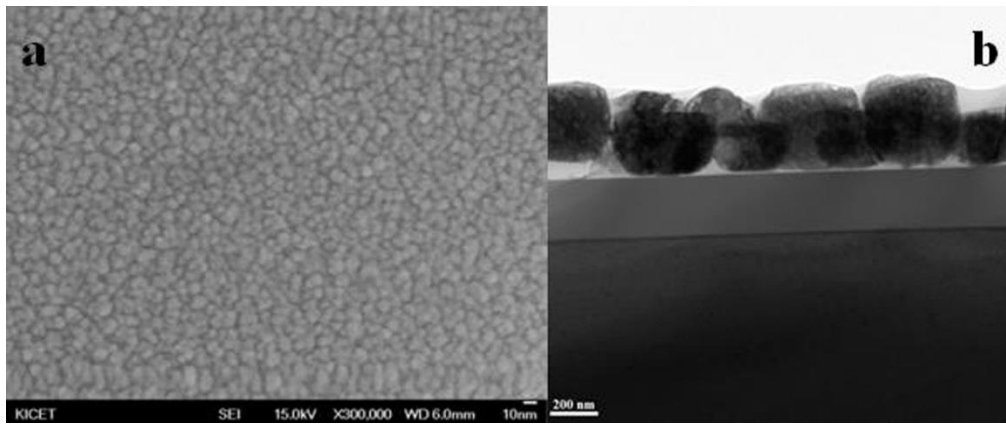

Fig. S2 (a) SEM image and (b) TEM image of radio-frequency sputtered  $\text{Fe}_2\text{O}_3$  film on the Z/Si.
